# Supplementary material for: Ti-doped iron phosphide nanoarrays grown on carbon cloth as a self-supported electrode for enhanced electrocatalytic nitrogen reduction
Source: Royal Society of Chemistry journal article supplement (doi:10.1039/d3nr03388k), 2023-01-01
Supplement: d3nr03388k1.pdf [file d3nr03388k1.pdf]

## Supporting Information

### Ti-doped Iron Phosphide Nanoarrays Grown on Carbon Cloth as a Self-supported Electrode for Enhanced Electrocatalytic Nitrogen Reduction

Senhao Wang,<sup>a</sup> Yuan Wang,<sup>a\*</sup> Tian C. Zhang,<sup>b</sup> Xu Ji,<sup>a</sup> Shaojun Yuan<sup>a\*</sup>

<sup>a</sup> Low-carbon Technology & Chemical Reaction Engineering Lab, College of Chemical Engineering, Sichuan University, Chengdu 610065, P. R. China

<sup>b</sup> Civil & Environmental Engineering Department, University of Nebraska-Lincoln, Omaha, NE 68182-0178, USA

\*Corresponding author: E-mail: [wangyuan2022@scu.edu.cn](mailto:wangyuan2022@scu.edu.cn) (Y. Wang), [ysj@scu.edu.cn](mailto:ysj@scu.edu.cn) (S.J. Yuan), Tel/fax: +86-28-85405201

#### S1. Supplementary Experimental

##### S1.1. Determination of NH<sub>3</sub>

The yield of NH<sub>3</sub> production was determined by the indophenol blue method. 50 μL oxidizing solution (4.5% NaClO and 0.75 M NaOH), 500 μL coloring solution (0.32 M NaOH and 0.4 M C<sub>7</sub>H<sub>5</sub>NaO<sub>3</sub>), and 50 μL catalytic solution (10 g L<sup>-1</sup> C<sub>5</sub>FeN<sub>6</sub>Na<sub>2</sub>O·2H<sub>2</sub>O) are added sequentially to the 4 mL tested electrolyte. The mixed solution is placed in the dark for 1 h, then determines the characteristic peak at 660 nm by an UV-vis spectrophotometer (UV-TU1810PC, Meishi Instrument, China). The fitted standard curve ( $y = 0.486x + 0.030$ ,  $R^2 = 0.999$ ) obtained by performing absorbance tests on NH<sub>4</sub>Cl solutions with different concentrations shows a good linear relationship between the absorbance and concentration of NH<sub>3</sub>.

##### S1.2. Determination of N<sub>2</sub>H<sub>4</sub>

The possible by-product N<sub>2</sub>H<sub>4</sub> during the NRR electro-reduction was performed by the Watt and Chrisp method. The coloring solution is prepared by C<sub>9</sub>H<sub>11</sub>NO (5.99 g), concentrated HCl (30 mL) and C<sub>2</sub>H<sub>5</sub>OH (300 mL). Add 1 mL the above solution to 1 mL tested electrolyte.

The mixed solution is placed for 15 min, then determines the characteristic peak at 455 nm by an UV-vis spectrophotometer. The fitted standard curve ( $y = 0.816x + 0.018$ ,  $R^2 = 0.999$ ) obtained by performing absorbance tests on  $N_2H_4$  solutions of different concentrations shows a good linear relationship between the absorbance and concentration of  $N_2H_4$ .

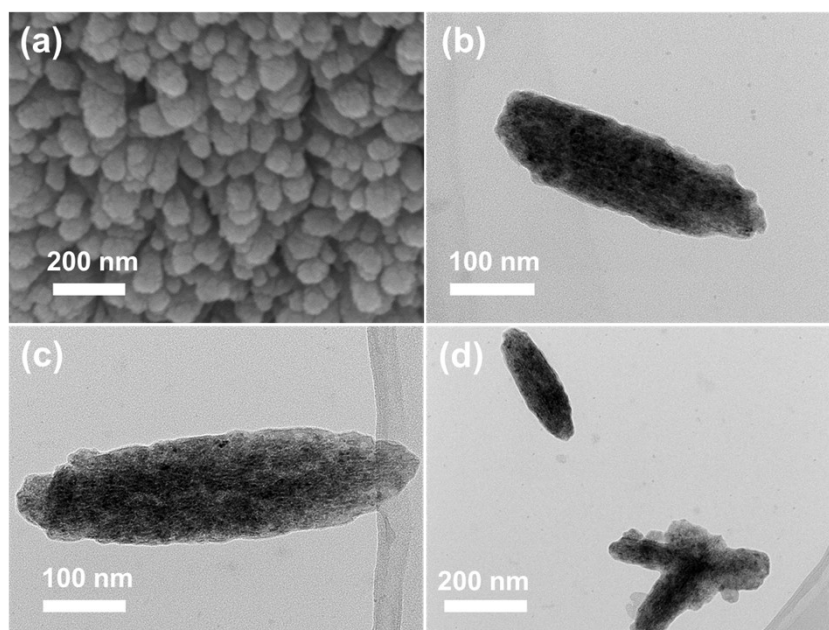

**Fig. S1.** (a) SEM image of Ti-FeP/CC at higher magnification. (b-d) TEM images of nanorod Ti-FeP/CC.

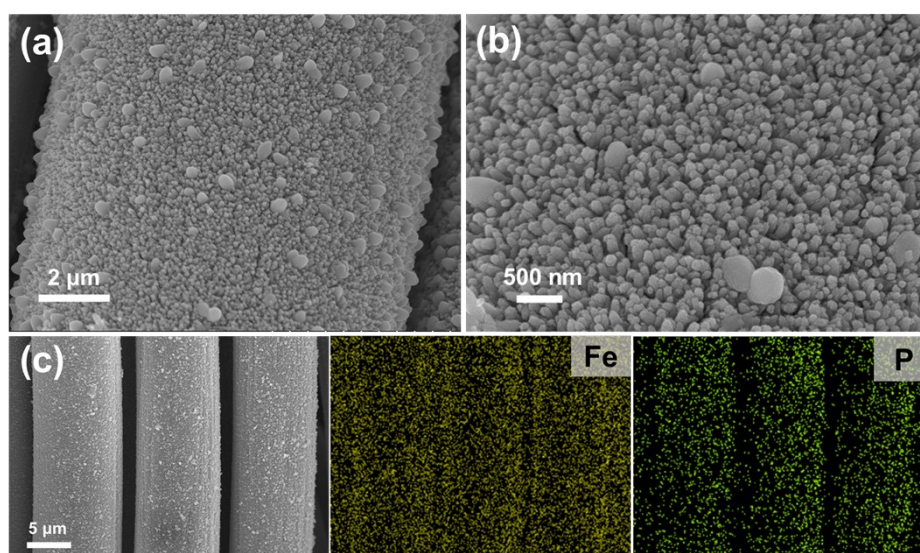

**Fig. S2.** (a and b) SEM images of FeP/CC. (c) SEM image and corresponding EDX elemental mapping images of FeP/CC.

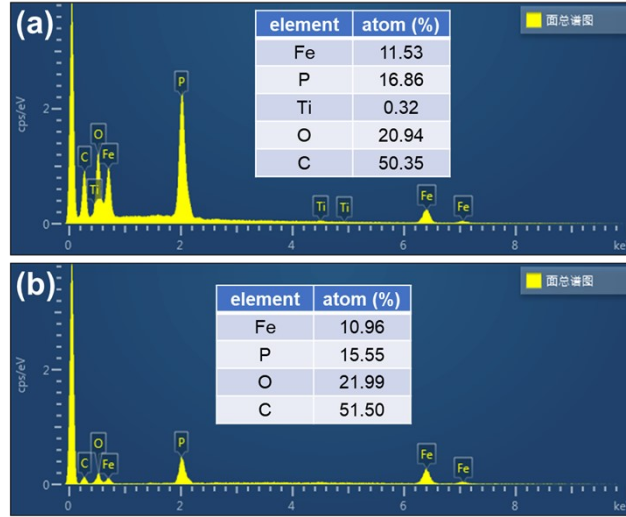

**Fig. S3.** EDX spectrum of Ti-FeP/CC (a) and FeP/CC (b).

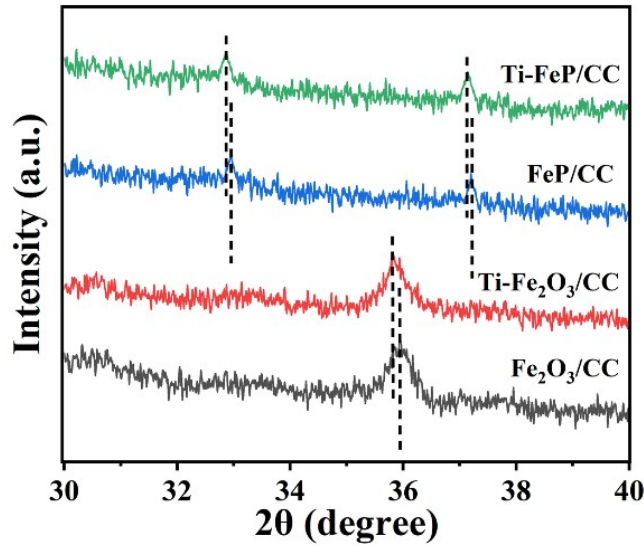

**Fig. S4.** The magnified XRD patterns of Fe<sub>2</sub>O<sub>3</sub>/CC, Ti-Fe<sub>2</sub>O<sub>3</sub>/CC, FeP/CC and Ti-FeP/CC ranged from 30° to 40°.

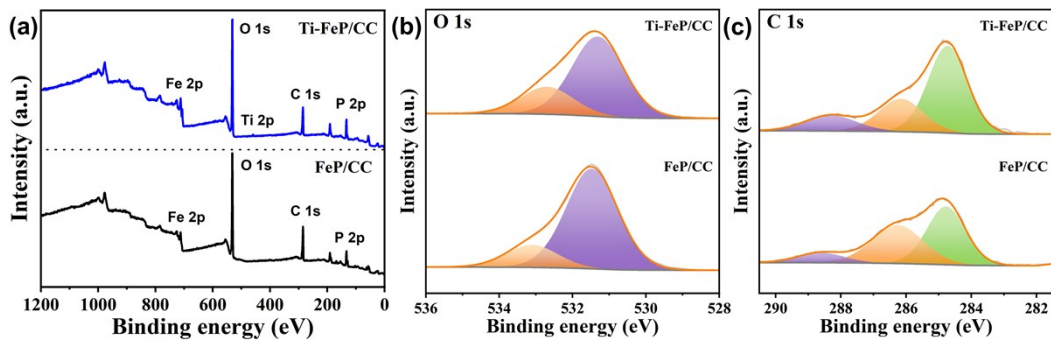

**Fig. S5.** (a) XPS survey spectra of Ti-FeP/CC and FeP/CC. High resolution XPS spectra of Ti-FeP/CC: (b) O 1s; and (c) C 1s.

**Table S1.** Solution resistance ( $R_s$ ) and charge transfer resistance ( $R_{ct}$ ) of Ti-FeP/CC and FeP/CC determined by EIS spectra.

| Catalyst  | $R_s$ (ohm) | $R_{ct}$ (ohm) | Equivalent circuit diagram |
|-----------|-------------|----------------|----------------------------|
| Ti-FeP/CC | 11.065      | <b>0.06405</b> |                            |
| FeP/CC    | 11.114      | 0.09486        |                            |

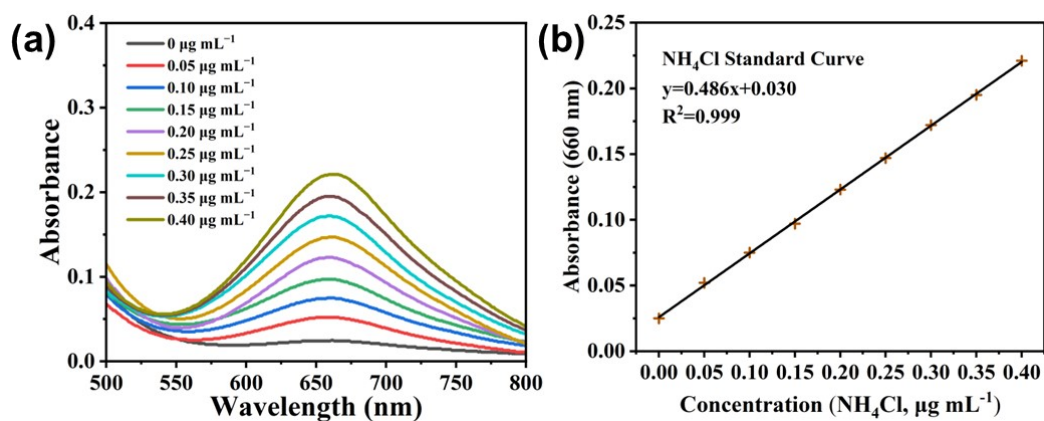

**Fig. S6.** (a) UV-vis spectra of various  $\text{NH}_4^+$  concentrations. (b) Calibration curve used for calculation of  $\text{NH}_3$  concentrations.

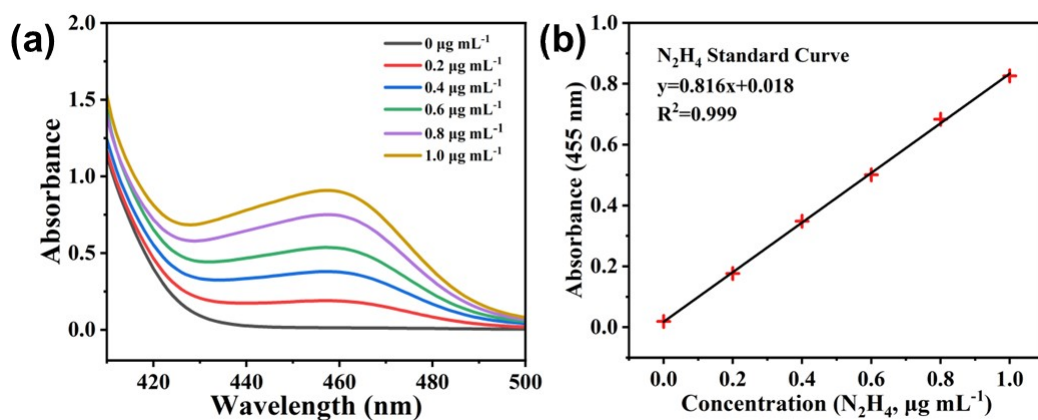

**Fig. S7.** UV-vis spectra of various  $\text{N}_2\text{H}_4$  concentrations. (b) Calibration curve used for calculation of  $\text{N}_2\text{H}_4$  concentrations.

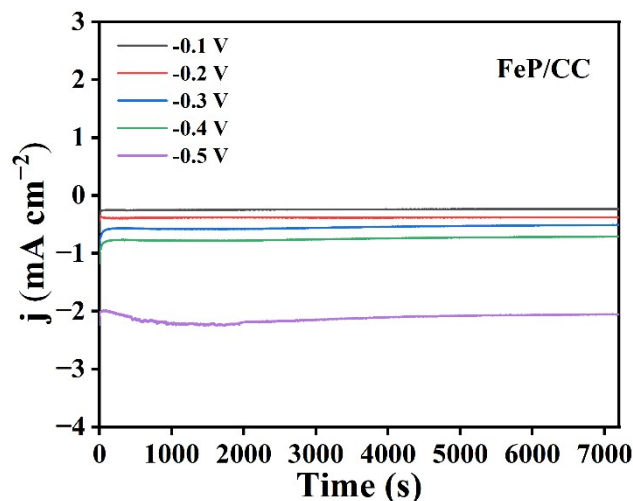

**Fig. S8.** Chronoamperometry curves of FeP/CC in  $N_2$ -saturated 0.1 M  $Na_2SO_4$  solution at different potentials for 2 h.

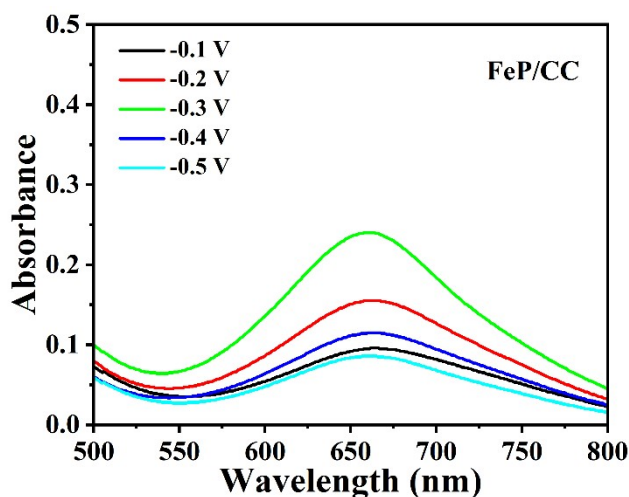

**Fig. S9.** UV-vis absorption spectra of electrolytes obtained by FeP/CC at different potentials stained with the indophenol indicator.

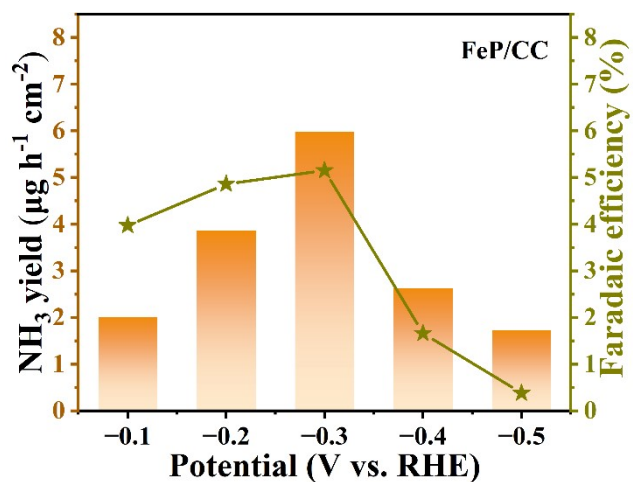

**Fig. S10.**  $NH_3$  yield and Faradaic efficiency of FeP/CC at corresponding potentials.

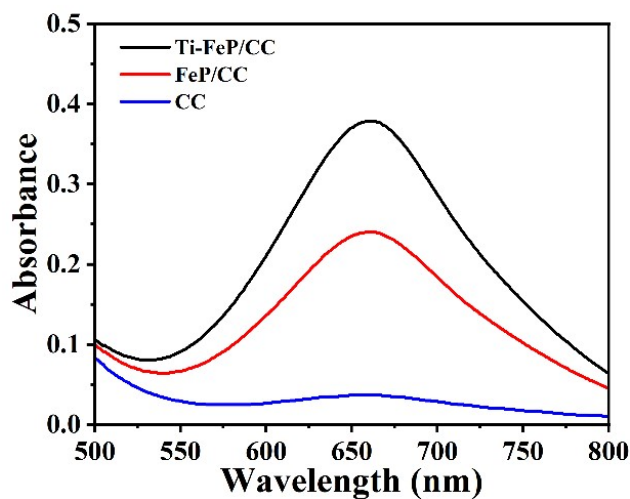

**Fig. S11.** UV-vis absorption spectra of  $\text{NH}_4^+$  on different electrodes at -0.30 V after 2 h electrolysis.

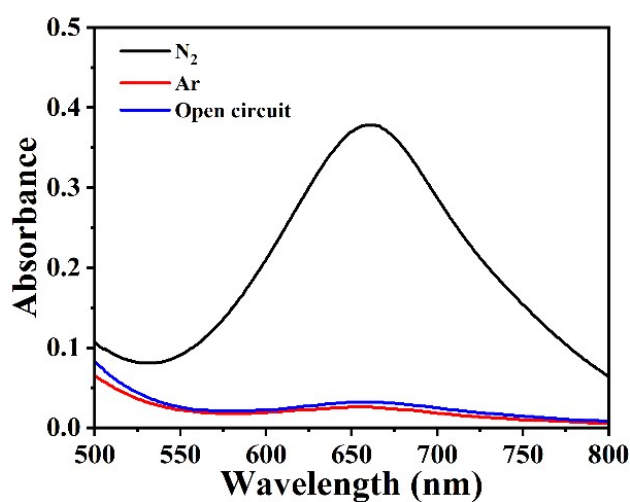

**Fig. S12.** UV-vis absorption spectra of  $\text{NH}_4^+$  on Ti-FeP/CC at different potentials after electrolysis for 2 h under different electrochemical conditions.

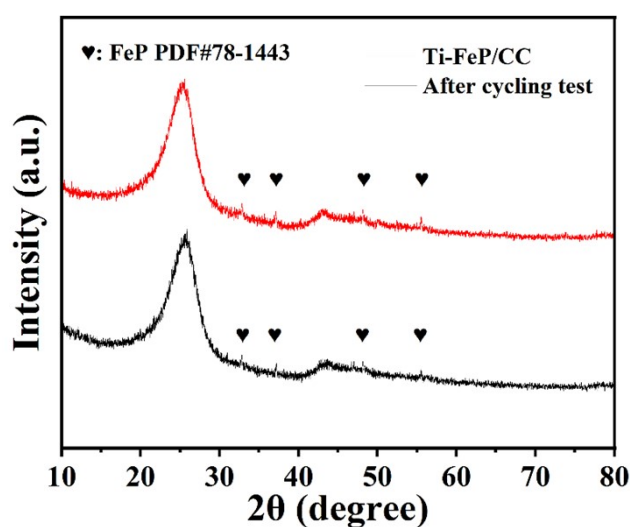

**Fig. S13.** XRD patterns of the Ti-FeP/CC electrode after NRR stability measurement.

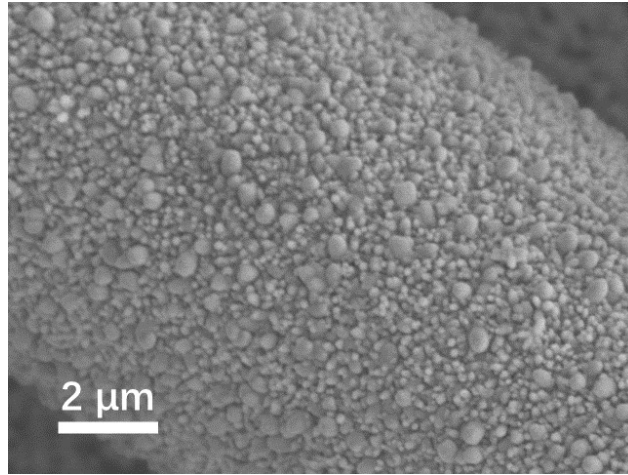

**Fig. S14.** SEM image of the Ti-FeP/CC after NRR stability measurement.

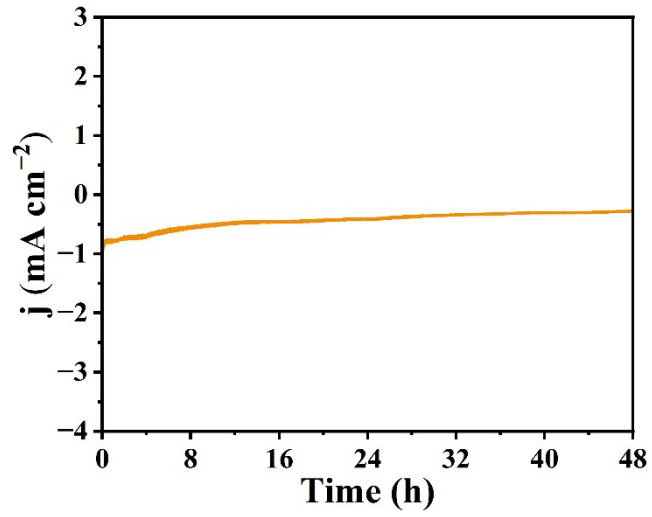

**Fig. S15.** Long-term current density time curve at -0.3 V (vs. RHE) for 48 h.

**Table S2.** Comparison of NRR performance of previously reported transition metal-based catalysts.

| Catalyst                            | Electrolyte                           | NH <sub>3</sub> yield                                                                                               | FE (%)       | Ref.             |
|-------------------------------------|---------------------------------------|---------------------------------------------------------------------------------------------------------------------|--------------|------------------|
| Ti-FeP/CC                           | 0.1 M Na <sub>2</sub> SO <sub>4</sub> | <b>10.93 μg h<sup>-1</sup> cm<sup>-2</sup></b><br><b>(1.79×10<sup>-10</sup> mol s<sup>-1</sup> cm<sup>-1</sup>)</b> | <b>10.77</b> | <b>This Work</b> |
| FeS@MoS <sub>2</sub>                | 0.1 M HCl                             | 8.45 μg h <sup>-1</sup> cm <sup>-2</sup>                                                                            | 2.96         | 1                |
| NH <sub>2</sub> -MIL-88B-Fe         | 0.1 M Na <sub>2</sub> SO <sub>4</sub> | 1.205×10 <sup>-10</sup> mol s <sup>-1</sup> cm <sup>-1</sup>                                                        | 12.45        | 2                |
| CoFe <sub>2</sub> O <sub>4</sub>    | 0.1 M Na <sub>2</sub> SO <sub>4</sub> | 4.22×10 <sup>-11</sup> mol s <sup>-1</sup> cm <sup>-1</sup>                                                         | 6.2          | 3                |
| MoN NA                              | 0.1 M HCl                             | 3.01×10 <sup>-10</sup> mol s <sup>-1</sup> cm <sup>-1</sup>                                                         | 1.15         | 4                |
| TiO <sub>2</sub> /Ti                | 0.1 M Na <sub>2</sub> SO <sub>4</sub> | 9.16×10 <sup>-11</sup> mol s <sup>-1</sup> cm <sup>-1</sup>                                                         | 2.50         | 5                |
| Al-Co <sub>3</sub> O <sub>4</sub>   | 0.1 M KOH                             | 6.48×10 <sup>-11</sup> mol s <sup>-1</sup> cm <sup>-1</sup>                                                         | 6.25         | 6                |
| PdRu NS-NF                          | 0.1 M KOH                             | 20.46 μg h <sup>-1</sup> cm <sup>-2</sup>                                                                           | 2.11         | 7                |
| VN/TM                               | 0.1 M HCl                             | 8.40×10 <sup>-11</sup> mol s <sup>-1</sup> cm <sup>-1</sup>                                                         | 2.25         | 8                |
| Fe <sub>2</sub> O <sub>3</sub> -CNT | KHCO <sub>3</sub>                     | 2.2×10 <sup>-3</sup> μg h <sup>-1</sup> cm <sup>-2</sup>                                                            | 0.03         | 9                |
| CuO/RGO                             | 0.1 M Na <sub>2</sub> SO <sub>4</sub> | 1.8×10 <sup>-10</sup> mol s <sup>-1</sup> cm <sup>-1</sup>                                                          | 3.9          | 10               |

## References

1. Y. Guo, Z. Yao, B. J. J. Timmer, X. Sheng, L. Fan, Y. Li, F. Zhang and L. Sun, *Nano Energy*, 2019, **62**, 282-288.
2. X. Yi, X. He, F. Yin, T. Yang, B. Chen and G. Li, *J. Mater. Sci.*, 2020, **55**, 12041-12052.
3. M. I. Ahmed, S. Chen, W. Ren, X. Chen and C. Zhao, *Chem. Commun.*, 2019, **55**, 12184-12187.
4. L. Zhang, X. Ji, X. Ren, Y. Luo, X. Shi, A. M. Asiri, B. Zheng and X. Sun, *ACS Sustain. Chem. Eng.*, 2018, **6**, 9550-9554.
5. R. Zhang, X. Ren, X. Shi, F. Xie, B. Zheng, X. Guo and X. Sun, *ACS Appl. Mater. Interfaces*, 2018, **10**, 28251-28255.
6. X.-W. Lv, Y. Liu, R. Hao, W. Tian and Z.-Y. Yuan, *ACS Appl. Mater. Interfaces*, 2020, **12**, 17502-17508.
7. Y. Li, H. Yu, Z. Wang, S. Liu, Y. Xu, X. Li, L. Wang and H. Wang, *Int. J. Hydrogen Energy*, 2020, **45**, 5997-6005.
8. R. Zhang, Y. Zhang, X. Ren, G. Cui, A. M. Asiri, B. Zheng and X. Sun, *ACS Sustain. Chem. Eng.*, 2018, **6**, 9545-9549.
9. S. Chen, S. Perathoner, C. Ampelli, C. Mebrahtu, D. Su and G. Centi, *Angew. Chem., Int. Ed.*, 2017, **56**, 2699-2703.
10. F. Wang, Y.-p. Liu, H. Zhang and K. Chu, *ChemCatChem*, 2019, **11**, 1441-1447.
